# Supplementary material
Source: bioRxiv or medRxiv preprint supplement (https://medrxiv.org/highwire/filestream/80245/field_highwire_adjunct_files/0/2020.05.06.20092957-1.pdf)
Supplement: Supplementary file [file 2020.05.06.20092957-1.pdf]

## **Supplementary material**

Associations with covid-19 hospitalisation amongst 406,793 adults: the UK Biobank prospective cohort study

**Supplementary Table S1:** Baseline assessment details for variables analysed in the current study.

**Supplementary Table S2:** Univariable associations with covid-19 hospitalization (n=406,793).

**Supplementary Table S3:** Results from a multivariable model examining comorbidities together, adjusted for age, sex and ethnicity, for association with hospitalization with covid-19 (n=406,793).

**Supplementary Table S4:** Results for the parsimonious multivariable regression model presenting associations with covid-19 hospitalization (n=406,793).

**Supplementary Table S5:** Sensitivity analysis presenting results from a multivariable regression for associations with covid-19 hospitalization (n=406,703).

## **UK Biobank Medication Codes**

**Supplementary Table S1:** Baseline assessment details for variables analysed in the current study.

| <b>Measure</b>                                             | <b>Assessment details</b>                                                                                                                                                                                                                                                                                                                                                                                                                                                       |
|------------------------------------------------------------|---------------------------------------------------------------------------------------------------------------------------------------------------------------------------------------------------------------------------------------------------------------------------------------------------------------------------------------------------------------------------------------------------------------------------------------------------------------------------------|
| <b><i>Touch-screen self-administered questionnaire</i></b> |                                                                                                                                                                                                                                                                                                                                                                                                                                                                                 |
| Ethnicity                                                  | Response options included: White (English/Irish or other white background), Asian or British Asian (Indian/Pakistani/Bangladeshi or other Asian background), Black or Black British (Caribbean, African, or other black background), Chinese, mixed (White and Black Caribbean or African, White and Asian, or other mixed background), or other ethnic group (not defined).                                                                                                    |
| Smoking status                                             | Determined by response to “Do you smoke tobacco now?” and “In the past, how often have you smoked tobacco?”.                                                                                                                                                                                                                                                                                                                                                                    |
| Alcohol intake                                             | Determined by response to “About how often do you drink alcohol?” (options: Daily or almost daily; Three or four times a week; Once or twice a week; One to three times a month; Special occasions only; Never).                                                                                                                                                                                                                                                                |
| Townsend deprivation index                                 | Determined according to participant postcode at recruitment and the corresponding output area from the preceding national census. The index was calculated based on the output area’s employment status, home and car ownership, and household condition; the higher and more positive the index, the more deprived an area.                                                                                                                                                    |
| Education level                                            | Determined by response to “Which of the following qualifications do you have? (You can select more than one)” (options: College or University degree; A levels/AS levels or equivalent; O levels/GCSEs or equivalent; CSEs or equivalent; NVQ or HND or HNC or equivalent; Other professional qualifications e.g. nursing, teaching; None of the above). For analyses, qualifications lower than “O level/GCSEs or equivalent” were considered together as “Less than O level”. |
| <b><i>Comorbidities (self-report)</i></b>                  |                                                                                                                                                                                                                                                                                                                                                                                                                                                                                 |
| Diabetes                                                   | Touchscreen response to “Has a doctor ever told you that you have diabetes?”                                                                                                                                                                                                                                                                                                                                                                                                    |
| Hypertension, ischemic heart disease, stroke               | Touchscreen response to "Has a doctor ever told you that you have any of the following conditions?" (options: heart attack; angina; stroke; high blood pressure; none of the above).                                                                                                                                                                                                                                                                                            |
| Chronic obstructive pulmonary disease, asthma              | Touchscreen response to "Has a doctor ever told you that you have any of the following conditions?" (options: blood clot in the leg (DVT); blood clot in the lung; emphysema/chronic bronchitis; asthma; hayfever, allergic rhinitis or eczema; none of the above; prefer not to answer)                                                                                                                                                                                        |
| All comorbidities                                          | Additionally, history of comorbidity was captured during interview, including for obstructive sleep apnoea which was not captured by touchscreen questions.                                                                                                                                                                                                                                                                                                                     |
| <b><i>Physical measures</i></b>                            |                                                                                                                                                                                                                                                                                                                                                                                                                                                                                 |
| Weight                                                     | BV-418 MA body composition analyser (Tanita, Arlington Heights, IL)                                                                                                                                                                                                                                                                                                                                                                                                             |
| Height                                                     | Seca 202 height measure (Seca, Birmingham, UK)                                                                                                                                                                                                                                                                                                                                                                                                                                  |
| Blood pressure                                             | Systolic and diastolic blood pressure were measured after the participant had been at rest for at least 5 minutes in the seated position using the HEM- 70151T digital blood pressure monitor (Omron, Hoofddorp, The Netherlands) with a suitably sized cuff. Measurements were taken twice, separated in time by an interview; the mean of both measurements was used for analysis.                                                                                            |

**Supplementary Table S2:** Univariable associations with covid-19 hospitalization (n=406,793).

|                                                        | <b>OR (95% CI)</b>  | <b>P-value</b> |
|--------------------------------------------------------|---------------------|----------------|
| <b>Age at recruitment</b> (per decade)                 | 1.17 (1.06 to 1.30) | 0.002          |
| <b>Age in January 2020</b> (per decade)                | 1.16 (1.05 to 1.28) | 0.004          |
| <b>Sex</b>                                             |                     |                |
| Women                                                  |                     |                |
| Men                                                    | 1.62 (1.38 to 1.90) | <0.001         |
| <b>Ethnicity</b>                                       |                     |                |
| White                                                  |                     |                |
| Indian/Pakistani/Bangladeshi                           | 2.31 (1.50 to 3.58) | <0.001         |
| Chinese                                                | 1.73 (0.55 to 5.38) | 0.35           |
| Black                                                  | 3.99 (2.87 to 5.55) | <0.001         |
| Other/mixed                                            | 1.86 (1.19 to 2.91) | 0.006          |
| <b>Education level</b>                                 |                     |                |
| Less than O level                                      |                     |                |
| O level                                                | 0.54 (0.43 to 0.68) | <0.001         |
| A Level                                                | 0.62 (0.46 to 0.82) | 0.0008         |
| Degree                                                 | 0.61 (0.50 to 0.73) | <0.001         |
| <b>Townsend deprivation index</b>                      |                     |                |
| Least deprived quartile                                |                     |                |
| Quartile 2                                             | 1.27 (0.97 to 1.66) | 0.09           |
| Quartile 3                                             | 1.59 (1.23 to 2.05) | 0.0005         |
| Most deprived quartile                                 | 2.59 (2.04 to 3.29) | <0.001         |
| <i>Test of trend</i>                                   | 1.38 (1.29 to 1.49) | <0.001         |
| <b>Height</b> (per 10 cm)                              | 1.06 (0.97 to 1.15) | 0.20           |
| <b>Weight</b> (per 10 Kg)                              | 1.23 (1.17 to 1.29) | <0.001         |
| <b>BMI</b> (per 5 kg/m <sup>2</sup> )                  | 1.42 (1.31 to 1.54) | <0.001         |
| <b>Body mass index categories</b> (Kg/m <sup>2</sup> ) |                     |                |
| < 25                                                   |                     |                |
| ≥ 25, < 30                                             | 1.53 (1.25 to 1.89) | <0.001         |
| ≥ 30, < 35                                             | 1.94 (1.52 to 2.46) | <0.001         |
| > 35                                                   | 3.12 (2.34 to 4.16) | <0.001         |
| <b>Systolic blood pressure</b> (per 10 mmHg)           | 1.04 (1.00 to 1.09) | 0.06           |
| <b>Diastolic blood pressure</b> (per 10 mmHg)          | 1.12 (1.04 to 1.21) | 0.003          |
| <b>Alcohol intake frequency</b>                        |                     |                |
| Never or special occasion only                         |                     |                |
| One to three times a month                             | 0.85 (0.65 to 1.11) | 0.24           |
| Once or twice a week                                   | 0.70 (0.56 to 0.87) | 0.002          |
| Three or four times a week                             | 0.63 (0.49 to 0.80) | <0.001         |
| Daily or almost daily                                  | 0.64 (0.50 to 0.82) | <0.001         |
| <b>Smoking status</b>                                  |                     |                |
| Never                                                  |                     |                |
| Former                                                 | 1.53 (1.30 to 1.82) | <0.001         |
| Current                                                | 1.39 (1.07 to 1.82) | 0.015          |

Abbreviations: CI = confidence interval; OR = odds ratio.

**Supplementary Table S2 continued:**

|                                               | <b>OR (95% CI)</b>  | <b>P-value</b> |
|-----------------------------------------------|---------------------|----------------|
| <b>Comorbidity history</b>                    |                     |                |
| Diabetes                                      | 2.07 (1.58 to 2.72) | <0.001         |
| Hypertension                                  | 1.84 (1.57 to 2.16) | <0.001         |
| Ischaemic heart disease                       | 2.02 (1.62 to 2.52) | <0.001         |
| Stroke                                        | 2.19 (1.50 to 3.21) | <0.001         |
| Chronic obstructive pulmonary disease         | 2.74 (2.07 to 3.63) | <0.001         |
| Asthma                                        | 1.39 (1.13 to 1.71) | 0.002          |
| Obstructive sleep apnoea                      | 2.16 (1.33 to 3.50) | 0.002          |
| <b>Antihypertensive medication use</b>        |                     |                |
| ACE inhibitors                                | 1.83 (1.46 to 2.30) | <0.001         |
| Angiotensin receptor blockers                 | 1.54 (1.12 to 2.14) | 0.009          |
| Beta-blockers                                 | 1.68 (1.30 to 2.18) | <0.001         |
| Thiazide diuretics                            | 1.86 (1.45 to 2.39) | <0.001         |
| Loop diuretics                                | 3.05 (1.79 to 5.19) | <0.001         |
| Potassium sparing diuretics                   | 2.84 (1.18 to 6.86) | 0.020          |
| Calcium channel blockers                      | 1.87 (1.47 to 2.37) | <0.001         |
| Any antihypertensive medication               | 1.97 (1.66 to 2.32) | <0.001         |
| <b>Number of antihypertensive medications</b> |                     |                |
| None                                          |                     |                |
| 1                                             | 1.81 (1.46 to 2.25) | <0.001         |
| 2                                             | 2.01 (1.57 to 2.58) | <0.001         |
| 3                                             | 2.56 (1.78 to 3.67) | <0.001         |

Abbreviations: CI = confidence interval; OR = odds ratio.

**Supplementary Table S3:** Results from a multivariable model examining comorbidities together, adjusted for age, sex and ethnicity, for association with hospitalization with covid-19 (n=406,793).

|                                              | <b>OR (95% CI)</b>  | <b>P-value</b> |
|----------------------------------------------|---------------------|----------------|
| <b>Diabetes</b>                              | 1.31 (0.98 to 1.74) | 0.06           |
| <b>Hypertension</b>                          | 1.44 (1.20 to 1.72) | <0.001         |
| <b>Ischaemic heart disease</b>               | 1.32 (1.03 to 1.68) | 0.03           |
| <b>Stroke</b>                                | 1.52 (1.03 to 2.23) | 0.04           |
| <b>Chronic obstructive pulmonary disease</b> | 2.10 (1.55 to 2.84) | <0.001         |
| <b>Asthma</b>                                | 1.20 (0.96 to 1.49) | 0.11           |
| <b>Obstructive sleep apnoea</b>              | 1.40 (0.86 to 2.28) | 0.18           |

Abbreviations: CI = confidence interval; OR = odds ratio.

**Supplementary Table S4:** Results for the parsimonious multivariable regression model presenting associations with covid-19 hospitalization (n=406,793).

|                                                      | <b>OR (95% CI)</b>  | <b>P-value</b> |
|------------------------------------------------------|---------------------|----------------|
| <b>Age at recruitment</b> (per decade)               | 1.10 (0.98 to 1.22) | 0.10           |
| <b>Male sex</b>                                      | 1.49 (1.27 to 1.76) | <0.001         |
| <b>Ethnicity</b>                                     |                     |                |
| White                                                |                     |                |
| Indian/Pakistani/Bangladeshi                         | 2.20 (1.41 to 3.43) | 0.001          |
| Chinese                                              | 2.25 (0.72 to 7.03) | 0.16           |
| Black                                                | 3.22 (2.28 to 4.56) | <0.001         |
| Other/mixed                                          | 1.75 (1.11 to 2.75) | 0.016          |
| <b>Education level</b>                               |                     |                |
| Less than O level                                    |                     |                |
| O level                                              | 0.67 (0.53 to 0.85) | 0.001          |
| A Level                                              | 0.81 (0.61 to 1.08) | 0.15           |
| Degree                                               | 0.77 (0.63 to 0.94) | 0.009          |
| <i>Test for trend</i>                                |                     | 0.016          |
| <b>Townsend deprivation index</b>                    |                     |                |
| Least deprived quartile                              |                     |                |
| Quartile 2                                           | 1.23 (0.94 to 1.61) | 0.14           |
| Quartile 3                                           | 1.44 (1.11 to 1.87) | 0.006          |
| Most deprived quartile                               | 1.99 (1.55 to 2.55) | <0.001         |
| <i>Test for trend</i>                                |                     | <0.001         |
| <b>Body mass index categories (Kg/m<sup>2</sup>)</b> |                     |                |
| < 25                                                 |                     |                |
| ≥ 25, < 30                                           | 1.27 (1.03 to 1.57) | 0.03           |
| ≥ 30, < 35                                           | 1.42 (1.11 to 1.82) | 0.006          |
| > 35                                                 | 2.20 (1.63 to 2.97) | <0.001         |
| <i>Test for trend</i>                                |                     | <0.001         |
| <b>Smoking status</b>                                |                     |                |
| Never                                                |                     |                |
| Former                                               | 1.36 (1.14 to 1.62) | 0.001          |
| Current                                              | 1.09 (0.83 to 1.43) | 0.55           |
| <b>Hypertension</b>                                  | 1.34 (1.13 to 1.60) | 0.001          |
| <b>Chronic obstructive pulmonary disease</b>         | 1.93 (1.44 to 2.59) | <0.001         |

Abbreviations: CI = confidence interval; OR = odds ratio.

**Supplementary Table S5:** Sensitivity analysis presenting results from a multivariable regression for associations with covid-19 hospitalization (n=406,703). Participants with a positive covid-19 test but without documentation of hospitalization on the request form were excluded (n=90).

|                                                      | <b>OR (95% CI)</b>  | <b>P-value</b> |
|------------------------------------------------------|---------------------|----------------|
| <b>Age at recruitment</b> (per decade)               | 1.09 (0.97 to 1.23) | 0.14           |
| <b>Male sex</b>                                      | 1.46 (1.22 to 1.75) | <0.001         |
| <b>Ethnicity</b>                                     |                     |                |
| White                                                |                     |                |
| Indian/Pakistani/Bangladeshi                         | 2.31 (1.44 to 3.68) | <0.001         |
| Chinese                                              | 2.65 (0.85 to 8.30) | 0.09           |
| Black                                                | 2.61 (1.74 to 3.92) | <0.001         |
| Other/mixed                                          | 1.62 (0.98 to 2.69) | 0.06           |
| <b>Education level</b>                               |                     |                |
| Less than O level                                    |                     |                |
| O level                                              | 0.64 (0.50 to 0.82) | <0.001         |
| A Level                                              | 0.76 (0.56 to 1.04) | 0.09           |
| Degree                                               | 0.68 (0.55 to 0.85) | 0.001          |
| <i>Test for trend</i>                                |                     | 0.001          |
| <b>Townsend deprivation index</b>                    |                     |                |
| Least deprived quartile                              |                     |                |
| Quartile 2                                           | 1.30 (0.96 to 1.74) | 0.09           |
| Quartile 3                                           | 1.51 (1.14 to 2.01) | 0.004          |
| Most deprived quartile                               | 2.12 (1.62 to 2.78) | <0.001         |
| <i>Test for trend</i>                                |                     | <0.001         |
| <b>Body mass index categories (Kg/m<sup>2</sup>)</b> |                     |                |
| < 25                                                 |                     |                |
| ≥ 25, < 30                                           | 1.33 (1.05 to 1.68) | 0.016          |
| ≥ 30, < 35                                           | 1.50 (1.15 to 1.97) | 0.003          |
| > 35                                                 | 2.25 (1.62 to 3.12) | <0.001         |
| <i>Test for trend</i>                                |                     | <0.001         |
| <b>Smoking status</b>                                |                     |                |
| Never                                                |                     |                |
| Former                                               | 1.33 (1.10 to 1.61) | 0.003          |
| Current                                              | 0.99 (0.73 to 1.34) | 0.94           |
| <b>Hypertension</b>                                  | 1.26 (1.04 to 1.52) | 0.018          |
| <b>Chronic obstructive pulmonary disease</b>         | 1.87 (1.36 to 2.58) | <0.001         |

Abbreviations: CI = confidence interval; OR = odds ratio.

## UK Biobank Medication Codes

**Calcium channel blockers:** 1140860426 - atenolol+nifedipine 50mg/20mg m/r capsule; 1140860358 - tenif capsule; 1140861090 - adalat 5mg capsule; 1140881702 - adalate 10mg capsule; 1140923572 - adipine mr 10 m/r tablet; 1140879802 - amlodipine; 1141200400 - amlostin 5mg tablet; 1140861110 - angiopine 5mg capsule; 1140860356 - beta-adalat capsule; 1141187094 - cabren 2.5mg m/r tablet; 1140916930 - calanif 5mg capsule; 1141173766 - calchan mr 10mg m/r tablet; 1140861106 - calcilat 10mg capsule; 1140861176 - cardene 20mg capsule; 1140927934 - cardilate mr 10mg m/r tablet; 1141199858 - cardioplen xl 5mg m/r tablet; 1140861120 - coracten sr 10mg m/r capsule; 1141166752 - coroday mr 20mg m/r tablet; 1141188836 - felendil xl 5mg m/r tablet; 1140888646 - felodipine; 1141165470 - felodipine+ramipril; 1141188576 - felogen xl 5mg m/r tablet; 1141188152 - felotens xl 5mg m/r tablet; 1141145870 - fortipine la40 m/r tablet; 1141152600 - genalat retard 10mg m/r tablet; 1140861190 - isradipine; 1141188920 - keloc sr 5mg m/r tablet; 1141187962 - kentipine mr 10mg m/r tablet; 1140861276 - lacidipine; 1141153026 - lercanidipine; 1140861282 - motens 2mg tablet; 1141200782 - neofel xl 5mg m/r tablet; 1140879810 - nicardipine; 1140861088 - nifedipine; 1141157140 - nifedipress mr 10 m/r tablet; 1141150538 - nifedotard 20mr m/r tablet; 1140911088 - nifelease 20mg m/r tablet; 1140861114 - nifensar xl 20mg m/r tablet; 1141169730 - nifopress retard 20mg m/r tablet; 1140872568 - nimodipine; 1140926966 - nimodrel mr 10 m/r tablet; 1140872472 - nimotop 30mg tablet; 1140928226 - nisoldipine; 1141162546 - nivaten retard 10mg m/r tablet; 1140868036 - parmid 10mg tablet; 1141201814 - parmid xl 5mg m/r tablet; 1140928212 - plendil 2.5mg m/r tablet; 1140861194 - prescal 2.5mg tablet; 1141150500 - slofedipine 20mg m/r tablet; 1140928234 - syscor mr 10mg m/r tablet; 1140927940 - tensipine mr 10 m/r tablet; 1140926188 - unipine xl 30mg m/r tablet; 1141190548 - valni 20 retard 20mg m/r tablet; 1140851790 - vasad 5mg capsule; 1141190160 - vasalpha 5mg m/r tablet; 1141153032 - zanidip 10mg tablet; 1140866546 - berkatens 40mg tablet; 1140866554 - cordilox 40mg tablet; 1141169096 - ethimil mr 240 m/r tablet; 1140866484 - geangin 40mg tablet; 1140866460 - half securon sr 120mg m/r tablet; 1141187056 - ranvera mr 240mg m/r tablet; 1140866466 - securon 40mg tablet; 1141153316 - tarka 2mg/180mg m/r capsule; 1141153328 - trandolapril + verapamil hydrochloride; 1140881692 - univer 120mg m/r capsule; 1141187774 - vera-til sr 120mg m/r tablet; 1140888510 - verapamil; 1141150926 - verapress mr 240 m/r tablet; 1141169710 - vertab sr 240 m/r tablet; 1141184390 - zolvera 40mg/5ml oral solution; 1140861138 - adizem-60 m/r tablet; 1140926780 - adizem-xl plus m/r capsule; 1140861136 - angiozem 60mg m/r tablet; 1140917428 - angitil sr 90 m/r capsule; 1141175224 - bi-carzem sr 60mg m/r capsule; 1140861130 - britiazim 60mg m/r tablet; 1141153454 - calazem 60mg m/r tablet; 1140851730 - calcicard 60mg tablet; 1141157136 - dilcardia sr 60mg m/r capsule; 1140879806 - diltiazem; 1140926778 - diltiazem hcl+hydrochlorothiazide 150mg/12.5mg m/r capsule; 1140861166 - dilzem sr 60mg long acting m/r capsule; 1141185444 - disogram sr 60mg m/r capsule; 1141180238 - horizem sr 90mg m/r capsule; 1140923618 - kentiazem 60mg m/r capsule; 1141156656 - optil 60mg m/r tablet; 1140911698 - slozem 120mg m/r capsule; 1140861128 - tildiem 60mg m/r tablet; 1141151474 - viazem xl 120mg m/r capsule; 1141174684 - zemret 180 xl m/r capsule; 1141167832 - zemtard 120 xl m/r capsule; 1141171804 - zildil sr 60mg m/r capsule; 1141153394 - mibefradil; 1141153400 - posicor 50mg tablet.

**Beta-Blockers:** 1140866724 - acebutolol; 1140860422 - acebutolol+hydrochlorothiazide 200mg/12.5mg tablet; 1140866704 - angilol 10mg tablet; 1140866764 - apsolol 10mg tablet; 1140860212 - apsolox 20mg tablet; 1140860180 - arbralene 50mg tablet; 1140866738 - atenolol; 1141146126 - atenolol+bendrofluzide; 1141194810 - atenolol+bendroflumethiazide; 1141180778 - atenolol+chlortalidone; 1141146124 - atenolol+chlorthalidone; 1141146128 - atenolol+co-amilozide; 1140922930 - atenix 25mg tablet; 1140860348 - atenixco 50mg/12.5mg tablet; 1140864410 - antipressan 25mg tablet; 1140860172 - totamol 25mg tablet; 1140866758 - vasaten 50mg tablet; 1140851556 - bedranol 10mg tablet; 1140866784 - berkolol 10mg tablet; 1140866782 - beta-prograne 160mg m/r capsule; 1140851492 - betadren 5mg tablet; 1140866778 - betadur cr 160mg m/r capsule; 1140860266 - betaloc 50mg tablet; 1141184324 - bipranix 5mg tablet; 1140879760 - bisoprolol; 1140864950 - bisoprolol fumarate+hydrochlorothiazide 10mg/6.25mg tablet; 1141171152 - cardiacor 1.25mg tablet; 1140866712 - cardinol 10mg tablet; 1140909368 - carvedilol; 1140879762 - celiprolol; 1140860386 - co-betaloc tablet; 1140923336 - co-tenidone; 1140860194 - corgard 40mg tablet; 1140860492 - emcor 10mg tablet; 1141168498 - eucardic 3.125 tablet; 1140866802 - half beta-prograne 80mg m/r capsule; 1141152076 - half propanix la 80mg m/r capsule; 1141156754 -



half propatard la 80mg m/r capsule; 1140866798 - half-betadur cr 80mg m/r capsule; 1140866800 - half-inalderal la 80mg m/r capsule; 1140866804 - inderal 10mg tablet; 1140879824 - labetalol; 1140860244 - labrocol 100mg tablet; 1140851576 - laracor 20mg tablet; 1140917076 - lopranol la 160mg m/r capsule; 1140860274 - lopresor 50mg tablet; 1140860402 - lopresoretic tablet; 1140860278 - mepranix 50mg tablet; 1140875808 - metipranolol; 1140879818 - metoprolol; 1140860308 - metoprolol tartrate+chlorthalidone 100mg/12.5mg tablet; 1140860404 - metoprolol tartrate+hydrochlorothiazide 100mg/12.5mg tablet; 1140851522 - metoros 95mg tablet; 1140860434 - monocor 5mg tablet; 1140860192 - nadolol; 1140860312 - nadolol+bendrofluazide 40mg/5mg tablet; 1140860316 - nadolol+bendrofluazide 80mg/5mg tablet; 1141194804 - nadolol+bendroflumethiazide 40mg/5mg tablet; 1141164280 - nebilet 5mg tablet; 1141164276 - nebivolol; 1140879830 - oxprenolol; 1140860334 - trasidrex tablet; 1140860230 - oxyprenix sr 160mg m/r tablet; 1140851484 - paritane 20mg tablet; 1140879834 - penbutolol; 1140860320 - penbutolol sulphate+furosemide 40mg/20mg tablet; 1140860292 - pindolol; 1140860322 - pindolol+clopamide 10mg/5mg tablet; 1140910614 - prindolol; 1140866766 - propanix 10mg tablet; 1141156808 - propatard la 160mg m/r capsule; 1140879842 - propranolol; 1140860418 - propranolol hydrochloride+bendrofluazide 80mg/2.5mg capsule; 1141187048 - rapranol sr 80mg m/r capsule; 1140866726 - sectral 100mg capsule; 1140916730 - sloprolol 80mg m/r capsule; 1140851480 - slow-pren 160mg m/r tablet; 1140860220 - slow-trasicor 160mg m/r tablet; 1141182904 - soloc 5mg tablet; 1141172742 - syprol 5mg/5ml oral solution; 1140860324 - tenoret 50 tablet; 1140860328 - tenoretic tablet; 1140866756 - tenormin 25 tablet; 1141182968 - tensomex 100mg tablet; 1140860340 - timolol maleate+bendrofluazide 10mg/2.5mg tablet; 1140860342 - timolol maleate+bendrofluazide 20mg/5mg tablet; 1141194808 - timolol maleate+bendroflumethiazide 10mg/2.5mg tablet; 1140860336 - timolol maleate+co-amilozone 10mg/2.5mg/25mg tablet; 1140860250 - trandate 50mg tablet; 1140860222 - trasicor 20mg tablet; 1140860338 - viskaldix tablet; 1140860294 - visken 5mg tablet; 1141187780 - vivacor 5mg tablet; 1140881722 - avlocardyl retard 160mg m/r capsule; 1140879854 - sotalol; 1140860304 - beta-cardone 40mg tablet; 1140860362 - sotacor 80mg tablet; 1140860426 - atenolol+nifedipine 50mg/20mg m/r capsule; 1140860358 - tenif capsule; 1140860356 - beta-adalat capsule; 1140860332 - sotalol hydrochloride+hydrochlorothiazide 80mg/12.5mg tablet; 1140860318 - sotazide tablet.

**Angiotensin receptor blockers:** 1141145660 - valsartan; 1141201038 - valsartan+hydrochlorothiazide 80mg/12.5mg tablet; 1141145668 - diovan 40mg capsule; 1141201040 - co-diovan 80mg/12.5mg tablet; 1141156836 - candesartan cilexetil; 1141156846 - amias 2mg tablet; 1141171336 - eprosartan; 1141171344 - teveten 300mg tablet; 1141172682 - irbesartan+hydrochlorothiazide 150mg/12.5mg tablet; 1141152998 - irbesartan; 1141153006 - aprovel 75mg tablet; 1141172686 - coaprovel 150mg/12.5mg tablet; 1140916356 - losartan; 1141151016 - losartan potassium+hydrochlorothiazide 50mg/12.5mg tablet; 1140916362 - cozaar half strength 25mg tablet; 1141151018 - cozaar-comp 50mg/12.5mg tablet; 1141179974 - cozaar 25mg tablet; 1141193282 - olmesartan; 1141193346 - olmetec 10mg tablet; 1141166006 - telmisartan; 1141187788 - telmisartan+hydrochlorothiazide 40mg/12.5mg tablet; 1141187790 - micardisplus 40mg/12.5mg tablet; 1141172492 - micardis 20mg tablet.

**Thiazide diuretics:** 1140866354 - amilmaxco 5/50 tablet; 1141187790 - micardisplus 40mg/12.5mg tablet; 1141151018 - cozaar-comp 50mg/12.5mg tablet; 1141172686 - coaprovel 150mg/12.5mg tablet; 1141201040 - co-diovan 80mg/12.5mg tablet; 1140851430 - synuretic tablet; 1140851432 - hypertane-50 tablet; 1140866360 - triamaxco tablet; 1140866324 - triamterene+benzthiazide 50mg/25mg capsule; 1140866328 - triam-co tablet; 1140860784 - innozide tablet; 1140860736 - accuretic tablet; 1140866162 - hydrochlorothiazide; 1140860332 - sotalol hydrochloride+hydrochlorothiazide 80mg/12.5mg tablet; 1140926778 - diltiazem hcl+hydrochlorothiazide 150mg/12.5mg m/r capsule; 1141151016 - losartan potassium+hydrochlorothiazide 50mg/12.5mg tablet; 1140860404 - metoprolol tartrate+hydrochlorothiazide 100mg/12.5mg tablet; 1140860422 - acebutolol+hydrochlorothiazide 200mg/12.5mg tablet; 1140860386 - co-betaloc tablet; 1140860562 - methyl dopa+hydrochlorothiazide 250mg/15mg tablet; 1140860738 - quinalapril+hydrochlorothiazide 10mg/12.5mg tablet; 1140860764 - captopril+hydrochlorothiazide 25mg/12.5mg tablet; 1140860790 - enalapril maleate+hydrochlorothiazide 20mg/12.5mg tablet; 1140864950 - bisoprolol fumarate+hydrochlorothiazide 10mg/6.25mg tablet; 1140864952 - lisinopril+hydrochlorothiazide

10mg/12.5mg tablet; 1141172682 - irbesartan+hydrochlorothiazide 150mg/12.5mg tablet; 1141187788 - telmisartan+hydrochlorothiazide 40mg/12.5mg tablet; 1141201038 - valsartan+hydrochlorothiazide 80mg/12.5mg tablet; 1140851362 - esidrex k tablet; 1140851660 - serpasil-esidrex tablet; 1140866164 - esidrex 25mg tablet; 1140866168 - hydrosaluric 25mg tablet; 1140864176 - monozide 10 tablet; 1141194794 - bendroflumethiazide; 1141194800 - bendroflumethiazide+potassium 2.5mg/7.7mmol m/r tablet; 1140866440 - centyl k m/r tablet; 1140851332 - centyl 2.5mg tablet; 1141194804 - nadolol+bendroflumethiazide 40mg/5mg tablet; 1141194808 - timolol maleate+bendroflumethiazide 10mg/2.5mg tablet; 1141194810 - atenolol+bendroflumethiazide; 1140866136 - neo-naclex 5mg tablet; 1140866138 - chlorothiazide; 1140860348 - atenixco 50mg/12.5mg tablet; 1140866446 - neo-naclex k m/r tablet; 1140866128 - aprinox 2.5mg tablet; 1140866122 - bendrofluazide; 1140860312 - nadolol+bendrofluazide 40mg/5mg tablet; 1140860316 - nadolol+bendrofluazide 80mg/5mg tablet; 1140860318 - sotazide tablet; 1140860340 - timolol maleate+bendrofluazide 10mg/2.5mg tablet; 1140860342 - timolol maleate+bendrofluazide 20mg/5mg tablet; 1140860418 - propranolol hydrochloride+bendrofluazide 80mg/2.5mg capsule; 1140866450 - bendrofluazide+potassium 2.5mg/7.7mmol m/r tablet; 1140910442 - bzt - bendrofluazide; 1141146126 - atenolol+bendrofluazide; 1140866132 - berkozide 2.5mg tablet; 1140866440 - centyl k m/r tablet; 1140851332 - centyl 2.5mg tablet; 1140888918 - neo-bendromax 2.5mg tablet; 1140866136 - neo-naclex 5mg tablet; 1140866446 - neo-naclex k m/r tablet; 1140851336 - urizide 5mg tablet; 1140866090 - methyclothiazide; 1140851338 - enduron 5mg tablet; 1140909706 - chlortalidone; 1141180772 - triamterene+chlortalidone 50mg/50mg tablet; 1141180778 - atenolol+chlortalidone; 1140860308 - metoprolol tartrate+chlortalidone 100mg/12.5mg tablet; 1140923336 - co-tenidone; 1140864202 - chlortalidone tablet+potassium m/r tablet 25mg/6.7mmol pack; 1140866144 - chlortalidone; 1140851364 - hygroton k tablet combination pack; 1140866330 - triamterene+chlortalidone 50mg/50mg tablet; 1140866410 - kalspare tablet; 1141146124 - atenolol+chlortalidone; 1140923276 - co-amilozide; 1141146128 - atenolol+co-amilozide; 1140851436 - vasetic co-amilozide 5/50mg tablet; 1140860336 - timolol maleate+co-amilozide 10mg/2.5mg/25mg tablet; 1140866420 - moduretic tablet; 1140866416 - moduret 25 tablet; 1140866156 - cyclopenthiiazide; 1140866352 - navispare tablet; 1140851368 - navidrex-k tablet; 1140866158 - navidrex 500mcg tablet; 1140866422 - amiloride hcl+cyclopenthiiazide 2.5mg/250micrograms tablet; 1140923282 - co-flumactone; 1140866396 - aldactide 25 tablet; 1140866402 - dyazide tablet; 1140866078 - indapamide; 1141180592 - perindopril+indapamide; 1140888922 - nindaxa 2.5mg tablet; 1141146378 - natrilix sr 1.5mg m/r tablet; 1140917068 - opumide 2.5mg tablet; 1140866108 - xipamide; 1140866110 - diurexan 20mg tablet; 1140866092 - metolazone; 1140866094 - metenix-5 tablet; 1140866096 - xuret 500micrograms tablet; 1140866102 - polythiazide; 1140866104 - nephril 1mg tablet; 1140860334 - trasidrex tablet; 1140860322 - pindolol+clopamide 10mg/5mg tablet; 1140860338 - viskaldix tablet.

**Loop diuretics:** 1140866426 - amiloride hydrochloride+bumetanide 5mg/1mg tablet; 1140866280 - bumetanide; 1140866448 - bumetanide+potassium 500micrograms/7.7mmol m/r tablet; 1141168964 - betinex 1mg tablet; 1140866282 - burinex 1mg tablet; 1140866438 - burinex k m/r tablet; 1140866356 - burinex a tablet; 1140909708 - furosemide; 1141195254 - triamterene+furosemide 50mg/40mg tablet; 1141195258 - furosemide+potassium 20mg/10mmol m/r tablet; 1140851342 - aluzine 20mg tablet; 1140851400 - diuresal 40mg tablet; 1140851412 - frusetic 40mg tablet; 1140866182 - dryptal 40mg tablet; 1140866192 - froop 40mg tablet; 1140866194 - frusid 40mg tablet; 1141167108 - froop co 5mg/40mg tablet; 1140851414 - frumax 40mg tablet; 1140866406 - frumil tablet; 1140866408 - frusene tablet; 1140866412 - lasilactone capsule; 1140866418 - fru-co tablet; 1140851412 - frusetic 40mg tablet; 1141169088 - frusol 20mg/5ml s/f oral solution; 1140866116 - frusemide; 1140860320 - penbutolol sulphate+furosemide 40mg/20mg tablet; 1140866332 - triamterene+frusemide 50mg/40mg tablet; 1140866334 - lasoride tablet; 1141169088 - frusol 20mg/5ml s/f oral solution; 1140866248 - lasix 20mg tablet; 1140866262 - rusyde 20mg tablet; 1140888496 - torasemide; 1140864874 - torem 2.5mg tablet; 1140866200 - ethacrynic acid; 1140866202 - edecrin 50mg tablet; 1140866206 - ethacrynic acid 50mg tablet; 1141157184 - ethacrynic acid product; 1140866210 - piretanide; 1140866212 - arelix 6mg capsule; 1140866084 - mefruside; 1140866086 - baycaron 25mg tablet.

**Potassium-sparing Diuretics:** 1140866334 - lasoride tablet; 1140866332 - triamterene+frusemide 50mg/40mg tablet; 1140866418 - fru-co tablet; 1140866412 - lasilactone capsule; 1140866406 - frumil tablet; 1141167108 - froop co 5mg/40mg tablet; 1140866396 - aldactide 25 tablet; 1140923282

- co-flumactone; 1140866422 - amiloride hcl+cyclopentiazide 2.5mg/250micrograms tablet; 1140866352 - navispare tablet; 1140866416 - moduret 25 tablet; 1140866420 - moduretic tablet; 1140851436 - vasetic co-amilozide 5/50mg tablet; 1141146128 - atenolol+co-amilozide; 1140923276 - co-amilozide; 1140866410 - kalspare tablet; 1140866330 - triamterene+chlorthalidone 50mg/50mg tablet; 1141180772 - triamterene+chlorthalidone 50mg/50mg tablet; 1140866402 - dyazide tablet; 1141195254 - triamterene+furosemide 50mg/40mg tablet; 1140866408 - frusene tablet; 1140888512 - amiloride; 1140866354 - amilmaxco 5/50 tablet; 1140866426 - amiloride hydrochloride+bumetanide 5mg/1mg tablet; 1140851430 - synuretic tablet; 1140851432 - hypertane-50 tablet; 1140927174 - amilamont 5mg/ml s/f oral solution; 1140866222 - amilospare 5mg tablet; 1140866226 - berkamil 5mg tablet; 1140866220 - midamor 5mg tablet; 1140927174 - amilamont 5mg/ml s/f oral solution; 1140866360 - triamaxco tablet; 1140866388 - triamterene; 1140866324 - triamterene+benzthiazide 50mg/25mg capsule; 1140866328 - triam-co tablet; 1140866390 - dytac 50mg capsule; 1140866236 - spironolactone; 1140866244 - aldactone 25mg tablet; 1140851418 - diatensec 50mg tablet; 1140851420 - laractone 25mg tablet; 1140851508 - spiroprop tablet; 1140866308 - spiretic 25mg tablet; 1140866312 - spiroctan 25mg tablet; 1140866318 - spiolone 25mg tablet; 1140866306 - spiro spare 25mg tablet; 1141201244 - eplerenone; 1141201250 - inspra 25mg tablet.

**Angiotensin-converting-enzyme inhibitors:** 1140864952 - lisinopril+hydrochlorothiazide 10mg/12.5mg tablet; 1140888552 - enalapril; 1140860738 - quinalapril+hydrochlorothiazide 10mg/12.5mg tablet; 1140866340 - delvas tablet; 1140860790 - enalapril maleate+hydrochlorothiazide 20mg/12.5mg tablet; 1140860776 - innovace 2.5mg tablet; 1141170870 - pralenal 2.5mg tablet; 1140881712 - renitec 5mg tablet; 1140860784 - innozide tablet; 1140860750 - captopril; 1140860764 - captopril+hydrochlorothiazide 25mg/12.5mg tablet; 1140860752 - acepril 12.5mg tablet; 1140860758 - capoten 12.5mg tablet; 1141150328 - ecopace 12.5mg tablet; 1141167758 - hyteneze 12.5 tablet; 1141150560 - kaplon 12.5mg tablet; 1141151382 - hypapril 12.5mg tablet; 1140888556 - fosinopril; 1140864176 - monozide 10 tablet; 1140860878 - staril 10mg tablet; 1140860882 - cilazapril; 1140860892 - vascace 250micrograms tablet; 1141164148 - imidapril hydrochloride; 1141164154 - tanatril 5mg tablet; 1141180592 - perindopril+indapamide; 1140860728 - quinapril; 1140881706 - accupro 5mg tablet; 1140860802 - coversyl 2mg tablet; 1140860736 - accuretic tablet; 1140860806 - ramipril; 1141165470 - felodipine+ramipril; 1141188408 - tritace 1.25mg tablet; 1141199940 - lopace 2.5mg capsule; 1141200698 - ranace 1.25mg capsule; 1141188408 - tritace 1.25mg tablet; 1140860904 - trandolapril; 1141153328 - trandolapril + verapamil hydrochloride; 1140860912 - gopten 500micrograms capsule; 1140860918 - odrik 500micrograms capsule; 1140923712 - moexipril; 1140923718 - perdix 7.5mg tablet; 1140860696 - lisinopril; 1140860714 - zestril 2.5mg tablet; 1140860706 - carace 2.5mg tablet; 1140864910 - carace 10 plus tablet; 1141153316 - tarka 2mg/180mg m/r capsule.
